# Supplementary material
Source: publisher figshare collection journal article supplement (https://sage.figshare.com/ndownloader/files/17513294)
Supplement: Supplementary file 1 [file 17513294]

Supplementary Table 1. Quality assessment based on the Newcastle-Ottawa Scale of studies included in this meta-analysis. A study can be awarded maximum of one star (\*) for each item except for Control for important factor/additional factor. A maximum of two stars (\*\*) can be awarded for Control for important factor/additional factor.

| <b>Quality assessment</b>                           | <b>Gonzalez-Lopez et al</b> | <b>Kimball et al</b> | <b>Lee et al</b> | <b>Miller et al</b> | <b>Shlyankevich et al</b> |
|-----------------------------------------------------|-----------------------------|----------------------|------------------|---------------------|---------------------------|
| Adequate definition of case                         | *                           | *                    | *                | *                   | *                         |
| Representativeness of cases                         | *                           | *                    | *                | *                   | -                         |
| Selection of control                                | *                           | *                    | *                | *                   | *                         |
| Definition of control                               | *                           | *                    | *                | *                   | *                         |
| Control for important factor or additional factor   | **                          | **                   | **               | **                  | **                        |
| Exposure assessment                                 | -                           | -                    | -                | -                   | -                         |
| Same method of ascertainment for cases and controls | *                           | *                    | *                | *                   | *                         |
| Non-response rate                                   | -                           | -                    | -                | -                   | -                         |
| Total quality scores                                | 7/9                         | 7/9                  | 7/9              | 7/9                 | 6/9                       |
